# Supplementary material
Source: ML conference proceedings conference paper supplement (https://proceedings.neurips.cc/paper_files/paper/2020/hash/6c250b592dc94d4de38a79db4d2b18f2-Abstract.html)
Supplement: Supplementary file [file 6c250b592dc94d4de38a79db4d2b18f2-Supplemental.pdf]

## A Single hint setting

In this section, we modify the construction of [2] in the single hint setting to take into account knowledge of the parameter  $\alpha$ . Our goal is to prove Theorem 1. The algorithm is nearly identical to that of [2] and most of the analysis is the same. We refer the reader to the original reference for complete details.

---

### Algorithm 3 1-HINT $_\alpha$

---

**Input:** Parameter  $\alpha$

Define  $\lambda_0 = 1$  and  $r_0 = 1$

Set procedure  $\mathcal{A}$  to be Algorithm 2 in [2].

**for**  $t = 1, \dots, T$  **do**

  Get hint  $h_t$

  Get  $\bar{x}_t$  from procedure  $\mathcal{A}$ , and set

$$x_t \leftarrow \bar{x}_t + \frac{(\|\bar{x}_t\|^2 - 1)}{2r_t} h_t$$

  Play  $x_t$  and receive cost  $c_t$

  Set  $r_{t+1} \leftarrow \sqrt{r_t^2 + \frac{\alpha \max(0, -\langle c_t, h_t \rangle)}{\log(T)}}$

  Define  $\sigma_t = \frac{|\langle c_t, h_t \rangle|}{r_t}$

  Define  $\lambda_t$  as the solution to:

$$\lambda_t = \frac{\|c_t\|^2}{\sum_{\tau=1}^t \sigma_\tau + \lambda_\tau}$$

  Define the loss  $\ell_t(x) = \langle c_t, x \rangle + \frac{|\langle c_t, h_t \rangle|}{2r_t} (\|x\|^2 - 1)$ . Send the loss function  $\ell_t$  to  $\mathcal{A}$

**end for**

---

The only difference between our algorithm 1-HINT $_\alpha$  and Algorithm 1 of [2] is the definition of  $r_t$ : when we set  $r_{t+1} = \sqrt{r_t^2 + \frac{\max(0, -\langle c_t, h_t \rangle)\alpha}{\log(T)}}$ , [2] instead sets  $r_{t+1} = \sqrt{r_t^2 + \max(0, -\langle c_t, h_t \rangle)}$ . We can now prove Theorem 1, which we restate below for reference:

**Theorem 1.** *For any  $0 < \alpha < 1$ , there exists an algorithm 1-HINT $_\alpha$  that runs in  $O(d)$  time per update, takes a single hint sequence  $\vec{h}$ , and guarantees regret:*

$$\begin{aligned} \mathcal{R}_{1\text{-HINT}_\alpha}(\mathcal{B}, \vec{c} \mid \{\vec{h}\}) &\leq \frac{1}{2} + 4 \left( \sqrt{\sum_{t \in B_\alpha^{\vec{h}}} \|c_t\|^2} + \frac{\log T}{\alpha} + 2\sqrt{\frac{(\log T) \sum_{t=1}^T \max(0, -\langle c_t, h_t \rangle)}{\alpha}} \right) \\ &\leq O \left( \sqrt{\frac{(\log T) |B_\alpha^{\vec{h}}|}{\alpha}} + \frac{\log T}{\alpha} \right). \end{aligned}$$

*Proof.* Following [2], we observe that since  $\mathcal{A}$  always returns  $\bar{x}_t \in \mathcal{B}$ ,  $x_t \in \mathcal{B}$ . Further,

$$\langle c_t, x_t - u \rangle \leq \ell_t(x_t) - \ell_t(u) + \frac{\max(0, -\langle c_t, h_t \rangle)}{r_t},$$

and  $\ell_t$  is  $\sigma_t$ -strongly convex.

Next, by [2] Lemma 3.4, we have

$$\mathcal{R}_{1\text{-HINT}_\alpha}(\mathcal{B}, \vec{c} \mid \{\vec{h}\}) \leq \sum_{t=1}^T \frac{\max(0, -\langle c_t, h_t \rangle)}{r_t} + \sum_{t=1}^T \ell_t(\bar{x}_t) - \ell_t(u).$$

We can bound the first sum as:

$$\begin{aligned}
\sum_{t=1}^T \frac{\max(0, -\langle c_t, h_t \rangle)}{r_t} &\leq \frac{\log T}{\alpha} \sum_{t=1}^T \frac{\alpha \max(0, -\langle c_t, h_t \rangle) / \log T}{r_t} \\
&\leq \frac{2 \log T}{\alpha} \sqrt{\sum_{t=1}^T \frac{\alpha \max(0, -\langle c_t, h_t \rangle)}{\log T}} \\
&\leq \sqrt{2 \sum_{t=1}^T (\log T) \max(0, -\langle c_t, h_t \rangle)} \frac{1}{\alpha}.
\end{aligned}$$

For the second sum, we appeal to Lemma 3.6 of [2], which yields:

$$\begin{aligned}
\sum_{t=1}^T \ell_t(\bar{x}_t) - \ell_t(u) &\leq \frac{1}{2} + 4 \left( \sqrt{\sum_{t \in B_\alpha^{\bar{h}}} \|c_t\|^2} + \frac{r_T (\log T)}{\alpha} \right) \\
&\leq \frac{1}{2} + 4 \left( \sqrt{\sum_{t \in B_\alpha^{\bar{h}}} \|c_t\|^2} + \frac{\sqrt{(\log^2 T) + (\log T) \alpha \sum_{t=1}^T \max(0, -\langle c_t, h_t \rangle)}}{\alpha} \right) \\
&\leq \frac{1}{2} + 4 \left( \sqrt{\sum_{t \in B_\alpha^{\bar{h}}} \|c_t\|^2} + \frac{\log T}{\alpha} + \sqrt{\frac{(\log T) \sum_{t=1}^T \max(0, -\langle c_t, h_t \rangle)}{\alpha}} \right).
\end{aligned}$$

Combining these identities now yields the desired theorem.  $\square$

## B Full proofs: Constrained setting

### B.1 Proof of Theorem 2

**Theorem 2.** *Let  $\alpha \in (0, 1)$  be given. There exists a randomized algorithm  $\mathcal{A}_{MW}$  for OLO with  $K$  hint sequences that has a regret bound of*

$$\mathbb{E}[\mathcal{R}_{\mathcal{A}_{MW}}(\mathcal{B}, \vec{c} \mid H)] \leq O \left( \inf_{i \in K} \sqrt{\frac{(\log T)(|B_\alpha^{\bar{h}^{(i)}}| + \log K)}{\alpha}} + \frac{\log T}{\alpha} \right).$$

*Proof.* At each time step  $t$ , our goal is to pick a single hint  $h_t \in \{h_t^{(1)}, \dots, h_t^{(K)}\}$ . We instantiate this problem as an instance of the standard prediction with  $K$  experts problem with binary losses defined as follows.

$$\ell_{t,i} = \begin{cases} 0 & \text{if } |\langle c_t, h_t^{(i)} \rangle| \geq \alpha \|c_t\|, \\ 1 & \text{otherwise.} \end{cases}$$

Let  $\vec{h}^{(i^*)}$  denote the hint sequence with minimum loss in hindsight, i.e.,  $i^* = \operatorname{argmin}_{i \in K} \sum_t \ell_{t,i}$ . We note that by definition of the losses  $\ell$ , we have  $\sum_t \ell_{t,i^*} = |B_\alpha^{\vec{h}^{(i^*)}}|$ . Let  $\vec{h}^{MW} = (h_1^{(i_1)}, h_2^{(i_2)}, \dots)$  be the sequence of hints obtained by running the classical Multiplicative Weights algorithm with a decay factor of  $\eta = \frac{1}{2}$ . Then by standard analysis (e.g., Theorem 2.1 of Arora et al. [1]), we have the following.

$$\mathbb{E} \left[ \sum_t (\ell_{t,i_t} - \ell_{t,i^*}) \right] \leq 2 \log K + \frac{1}{2} \sum_t (\ell_{t,i^*}). \quad (6)$$

Substituting  $|B_\alpha^{\vec{h}^{(i^*)}}| = \sum_t \ell_{t,i^*}$  and rearranging,

$$\mathbb{E}[|B_\alpha^{\vec{h}^{MW}}|] = \mathbb{E} \left[ \sum_t \ell_{t,i_t} \right] \leq \frac{3}{2} |B_\alpha^{\vec{h}^{(i^*)}}| + 2 \log K. \quad (7)$$

We then run an instance of the single hint algorithm, 1-HINT $_{\alpha}$ , with the hint sequence  $\vec{h}^{\text{MW}}$ . Applying Theorem 1 yields the following.

$$\begin{aligned}\mathbb{E}[\mathcal{R}_{A_{\text{MW}}}(\mathcal{B}, \vec{c} \mid H)] &\leq O\left(\mathbb{E}\left[\sqrt{\frac{(\log T)|B_{\alpha}^{\vec{h}^{\text{MW}}}|}{\alpha}}\right] + \frac{\log T}{\alpha}\right) \\ &\leq O\left(\sqrt{\frac{(\log T)\mathbb{E}[|B_{\alpha}^{\vec{h}^{\text{MW}}}|]}{\alpha}} + \frac{\log T}{\alpha}\right) \\ &\leq O\left(\sqrt{\frac{(\log T)(|B_{\alpha}^{\vec{h}^{(\text{t}^*)}|} + \log K)}{\alpha}} + \frac{\log T}{\alpha}\right),\end{aligned}$$

where the first inequality follows from Jensen's inequality and the second one follows from (7).  $\square$

## B.2 Proof of Proposition 4

Before proving Proposition 4, we apply the analysis of adaptive follow-the-regularized-leader (FTRL) as in [19] to obtain:

**Proposition 14.** *For any  $w_{\star} \in \Delta_K$ , we have:*

$$\sum_{t=1}^T (\ell_t(w_t) - \ell_t(w_{\star})) \leq 2\sqrt{(\log^2 K) + (\log K) \sum_{t=1}^T \|g_t\|_{\infty}^2}.$$

*Proof.* To begin, recall that the entropic regularizer  $\psi(w) = \log(K) + \sum_{i=1}^K w^{(i)}(\log w^{(i)})$  is 1-strongly-convex with respect to the 1-norm over  $\Delta_K$ , has minimum value 0 and maximum value  $\log K$ .

Then, standard bounds for FTRL (e.g., [19, Theorem 1]) tell us that:

$$\begin{aligned}\sum_{t=1}^T \ell_t(w_t) - \ell_t(w_{\star}) &\leq \sqrt{\frac{(\log K) + \sum_{t=1}^T \|g_t\|_{\infty}^2}{\log K}} \psi(w_{\star}) + \sum_{t=1}^T \frac{\|g_t\|_{\infty}^2 \sqrt{\log K}}{2\sqrt{(\log K) + \sum_{\tau=1}^{t-1} \|g_{\tau}\|_{\infty}^2}} \\ &\leq \sqrt{\frac{(\log K) + \sum_{t=1}^T \|g_t\|_{\infty}^2}{\log K}} \psi(w_{\star}) + \sum_{t=1}^T \frac{\|g_t\|_{\infty}^2 \sqrt{\log K}}{2\sqrt{\sum_{\tau=1}^t \|g_{\tau}\|_{\infty}^2}} \\ &\leq \sqrt{\frac{(\log K) + \sum_{t=1}^T \|g_t\|_{\infty}^2}{\log K}} \psi(w_{\star}) + \sqrt{(\log K) \sum_{t=1}^T \|g_t\|_{\infty}^2} \\ &\leq 2\sqrt{(\log^2 K) + (\log K) \sum_{t=1}^T \|g_t\|_{\infty}^2}.\end{aligned}$$

$\square$

Now with Proposition 14 in hand, we can restate and prove:

**Proposition 4.** *Let  $w_t \in \Delta_K$  be chosen via FTRL on the losses  $\ell_t$  as in Algorithm 1. Then, for any  $w_{\star} \in \Delta_K$ , we have*

$$\sum_{t=1}^T \ell_t(w_t) \leq \frac{22 \log K}{\alpha} + 2 \sum_{t=1}^T \ell_t(w_{\star}).$$

*Proof.* From Proposition 3, we have

$$\sum_{t=1}^T \|g_t\|_\infty^2 \leq \sum_{t=1}^T \frac{4}{\alpha} \ell_t(w_t).$$

Combining this with the regret bound of Proposition 14 yields:

$$\sum_{t=1}^T \ell_t(w_t) - \ell_t(w_\star) \leq 2\sqrt{(\log^2 K) + \frac{4 \log K}{\alpha} \sum_{t=1}^T \ell_t(w_t)}.$$

If we set  $R = \sum_{t=1}^T \ell_t(w_t) - \ell_t(w_\star)$ , we can rewrite the above as:

$$R \leq 2\sqrt{(\log^2 K) + \frac{4 \log K}{\alpha} R + \frac{4 \log K}{\alpha} \sum_{t=1}^T \ell_t(w_\star)}.$$

Now we use  $\sqrt{a+b} \leq \sqrt{a} + \sqrt{b}$  and solve for  $R$ :

$$\begin{aligned} R &\leq \frac{16 \log K}{\alpha} + \sqrt{4 \log^2 K + \frac{16 \log K}{\alpha} \sum_{t=1}^T \ell_t(w_\star)} \\ &\leq \frac{18 \log K}{\alpha} + \sqrt{\frac{16 \log K}{\alpha} \sum_{t=1}^T \ell_t(w_\star)} \\ \implies \sum_{t=1}^T \ell_t(w_t) &\leq \sum_{t=1}^T \ell_t(w_\star) + \frac{18 \log K}{\alpha} + \sqrt{\frac{16 \log K}{\alpha} \sum_{t=1}^T \ell_t(w_\star)}. \end{aligned}$$

Next, observe that  $\sqrt{aX} \leq X + \frac{a}{4}$  for all  $a, X \geq 0$ , so that

$$\sum_{t=1}^T \ell_t(w_t) \leq 2 \sum_{t=1}^T \ell_t(w_\star) + \frac{22 \log K}{\alpha}.$$

as desired.  $\square$

## C Lower bound proofs

**Theorem 7.** For any  $\alpha$  and  $T \geq \frac{1}{\alpha} \log \frac{1}{\alpha}$ , there exists a sequence  $\vec{c}$  of costs and a set  $H$  of hint sequences,  $|H| = K$  for some  $K$ , such that: (i) there is a convex combination of the  $K$  hints that always has correlation  $\alpha$  with the costs and (ii) the regret of any online algorithm is at least  $\sqrt{\frac{\log K}{2\alpha}}$ .

*Proof.* Consider a one-dimensional problem with  $K = \frac{T2^B}{B}$  hint sequences for  $B = \alpha T$ . Suppose  $T \geq \frac{\log(1/\alpha)}{\alpha}$ , so that  $2^B \geq \frac{T}{B}$  and  $\log K \leq 2B = 2T\alpha$ . We group the hint sequences into  $\frac{T}{B}$  groups each of size  $2^B$ . We now specify the hint sequence in the  $i$ th such group for some arbitrary  $i$ . All hints in the  $i$ th group are 0 for all  $t \notin [(i-1)B, iB-1]$  and for  $t \in [iB, (i+1)B)$ , the hints take on the  $2^B$  possible sequences of  $\pm 1$ . Then it is clear that for any sequence of  $\pm 1$  costs, there is a convex combination of hints that places weight  $B/T$  on exactly one hint sequence in each of the  $T/B$  groups such that the linear combination always has correlation  $\alpha = B/T$  with the cost.

Let the costs be random  $\pm 1$ , so that the expected regret is  $\sqrt{T}$ . Then we conclude by observing  $\sqrt{\log K}/\sqrt{2\alpha} \leq \sqrt{2\alpha T}/\sqrt{2\alpha} = \sqrt{T}$ .  $\square$

**Theorem 8.** In the two-dimensional constrained setting, there is a sequence  $\vec{h}$  and  $\vec{c}$  of hints and costs ( $K = 1$ ) such that: (i)  $\forall t, \langle h_t, c_t \rangle \geq \alpha$ , and (ii) the regret of any online algorithm is at least  $\Omega(1/\alpha)$ .

*Proof.* Let  $e_0$  and  $e_1$  be orthogonal unit vectors, and let  $h_t = e_0$  for all  $t$ . Suppose that  $c_t = \alpha e_0 \pm \sqrt{1 - \alpha^2} e_1$  for all  $t$ , where the sign is chosen uniformly at random. Note that any online algorithm has expected reward at most  $\alpha T$  (since it cannot gain anything in the  $e_1$  direction, so it is best to place all the mass along  $e_0$ ).

On the other hand, we have

$$\mathbb{E} \left[ \left\| \sum_{t=1}^T c_t \right\|^2 \right] = \alpha^2 T^2 + T(1 - \alpha^2),$$

and thus the optimal vector in hindsight achieves a reward  $\sqrt{\alpha^2 T^2 + T(1 - \alpha^2)}$ . Thus the regret is

$$\frac{T(1 - \alpha^2)}{\alpha T + \sqrt{\alpha^2 T^2 + T(1 - \alpha^2)}} \geq \frac{T(1 - \alpha^2)}{2\alpha T + \sqrt{T(1 - \alpha^2)}} \geq \frac{1}{\alpha},$$

for sufficiently large  $T$ .  $\square$

## D Proofs from Section 4

**Theorem 10.** *Suppose  $\mathcal{A}_1, \dots, \mathcal{A}_K$  are deterministic OLO algorithms that are associated with monotone regret bounds  $\mathcal{S}_1, \dots, \mathcal{S}_K$ . Suppose  $\forall t, \sup_{x, y \in \mathcal{B}} \langle c_t, x - y \rangle \leq 1$ . Then, we have:*

$$\mathcal{R}_{\text{det}}(\mathcal{B}, \vec{c}) \leq K \left( 4 + 4 \min_i \mathcal{S}_i([1, T], \vec{c}) \right).$$

*Proof.* We can divide the operation of Algorithm 2 into phases in which  $\gamma$  is constant. Each phase may be further subdivided into sub-phases in which  $i$  is constant. First, let us bound the regret in a single phase with fixed  $\gamma$ . Suppose this phase has  $N \leq K$  sub-phases<sup>1</sup>. Let  $t_1, \dots, t_N$  be the time indices at which each sub-phase begins, and let  $t_{N+1} - 1$  be the last time index belonging to this phase. Notice that for all  $i \leq N$ , we must have  $r_{t_{i+1} - t_i - 1}^{i, \gamma} \leq \gamma$  since the  $i$ th sub-phase lasts for  $t_{i+1} - t_i$  iterations. Then since  $\sup_{x, y} \langle c_{t_{i+1} - 1}, x - y \rangle \leq 1$  for all  $i$  and  $x, y \in X$ , we have  $r_{t_{i+1} - t_i}^{i, \gamma} \leq r_{t_{i+1} - t_i - 1}^{i, \gamma} + 1 \leq \gamma + 1$ . Now we can write the regret incurred over this phase as:

$$\sup_{u \in X} \sum_{t=t_1}^{t_{N+1} - 1} \langle c_t, x_t - u \rangle \leq \sum_{i=1}^N \sup_{u \in X} \sum_{t=t_i}^{t_{i+1} - 1} \langle c_t, x_t - u \rangle \leq \sum_{i=1}^N r_{t_{i+1} - t_i}^{i, \gamma} \leq N(\gamma + 1) \leq K\gamma + K.$$

Let  $P$  denote the total number of phases. We now show that  $P \leq 2 + \max(-1, \log_2(\min_i \mathcal{S}_i([1, T], \vec{c})))$ . Suppose otherwise. Let  $j = \operatorname{argmin}_i \mathcal{S}_i([1, T], \vec{c})$  be the algorithm with the least total regret. Let us consider the  $(P - 1)$ th phase. In this phase,  $\gamma = 2^{P-2}$ . Since  $P > 2 + \log_2(\min_i \mathcal{S}_i([1, T], \vec{c}))$ , we must have  $\min_i \mathcal{S}_i([1, T], \vec{c}) < \gamma$ . Consider the  $j$ th sub-phase in this phase. Since  $\gamma$  will eventually increase, this sub-phase must eventually end. Therefore there must be some  $t$  and  $\tau$  such that  $t + \tau < T$  and

$$\sup_{u \in X} \sum_{\tau'=1}^{\tau} \langle c_{t+\tau'}, w_{\tau'} - u \rangle > \gamma,$$

where  $w_{\tau'}$  is the output of  $A_j$  after seeing input  $c_t, \dots, c_{t+\tau'-1}$ . By the increasing property of  $R_j$ , we also have:

$$\sup_{u \in X} \sum_{\tau'=1}^{\tau} \langle c_{t+\tau'}, w_{\tau'} - u \rangle \leq \mathcal{S}_j([t, t + \tau], \vec{c}) \leq \mathcal{S}_j([1, T], \vec{c}) < \gamma.$$

which is a contradiction. Therefore  $P \leq 2 + \max(-1, \log_2(\min_i \mathcal{S}_i([1, T], \vec{c})))$ .

Now we are in a position to calculate the total regret. Let  $1 = T_1, \dots, T_P$  be the start times of the  $P$  phases, and let  $T_{P+1} - 1 = T$  for notational convenience. Then we have:

$$\sup_{u \in X} \sum_{t=1}^T \langle c_t, x_t - u \rangle \leq \sum_{e=1}^P \sup_{u \in X} \sum_{t=T_e}^{T_{e+1} - 1} \langle c_t, x_t - u \rangle.$$

<sup>1</sup>All phases except maybe the last phase have exactly  $K$  sub-phases.

Now since the regret in an phase is at most  $K\gamma + K$ , and  $\gamma$  doubles every phase,

$$\begin{aligned} &\leq \sum_{e=1}^P K2^{e-1} + K \leq KP + K2^P \\ &\leq K2^{P+1} \\ &\leq K \left( 4 + 4 \min_i \mathcal{S}_i([1, T], \vec{c}) \right), \end{aligned}$$

where the second-to-last inequality follows from  $x \leq 2^x$  for  $x \geq 1$ , and the last inequality is from case analysis.  $\square$

---

**Algorithm 4** Randomized combiner.

---

**Input:** Online algorithms  $\mathcal{A}_1, \dots, \mathcal{A}_K$   
 Reset  $\mathcal{A}_1$   
 Set  $\gamma \leftarrow 1, \tau \leftarrow 1$   
 Initialize the candidate indices  $C \leftarrow [K]$   
 Choose index  $i$  uniformly at random from  $C$   
**for**  $t = 1, \dots, T$  **do**  
   **for**  $j \in C$  **do**  
     Get  $y_\tau^j$ , the  $\tau$ th output of  $\mathcal{A}_j$   
   **end for**  
 Respond  $x_t \leftarrow y_\tau^i$   
 Get cost  $c_t$ , define  $g_\tau \leftarrow c_t$   
**for**  $j \in C$  **do**  
   Send  $g_\tau$  to  $\mathcal{A}_j$  as  $\tau$ th cost  
   Set  $r_\tau^{j,\gamma} \leftarrow \sup_{u \in \mathcal{B}} \sum_{\tau'=1}^\tau \langle g_{\tau'}, y_{\tau'}^j - u \rangle$   
   **if**  $r_\tau^{j,\gamma} > \gamma$  **then**  
     Set  $C \leftarrow C \setminus \{j\}$   
   **end if**  
**end for**  
**if**  $i \notin C$  **then**  
   **if**  $C = \emptyset$  **then**  
     Set  $C \leftarrow [K]$   
     Set  $\gamma \leftarrow 2\gamma$   
   **end if**  
   Set  $\tau \leftarrow 1$   
   Reset  $\mathcal{A}_j$  for all  $j \in C$   
   Select index  $i$  uniformly at random from  $C$   
**end if**  
 Set  $\tau \leftarrow \tau + 1$   
**end for**

---

**Theorem 11.** *Suppose  $\mathcal{A}_1, \dots, \mathcal{A}_K$  are deterministic OLO algorithms with monotone regret bounds  $\mathcal{S}_1, \dots, \mathcal{S}_K$ . Suppose for all  $t$ ,  $\sup_{x, y \in \mathcal{B}} \langle c_t, x - y \rangle \leq 1$ . Then for any fixed sequence  $\vec{c}$  of costs (i.e., an oblivious adversary), Algorithm 4 guarantees:*

$$\mathbb{E}[\mathcal{R}_{\mathcal{C}_{\text{rand}}}(\mathcal{B}, \vec{c})] \leq \log_2(K + 1) \cdot \left( 4 + 4 \min_i \mathcal{S}_i([1, T], \vec{c}) \right).$$

Further, if  $\vec{c}$  is allowed to depend on the algorithm's randomness (i.e., an adaptive adversary), then

$$\mathcal{R}_{\mathcal{C}_{\text{rand}}}(\mathcal{B}, \vec{c}) \leq K \left( 4 + 4 \min_i \mathcal{S}_i([1, T], \vec{c}) \right).$$

*Proof.* We divide the operation of Algorithm 4 into phases in which  $\gamma$  is constant. Each phase is further subdivided into sub-phases in which  $i$  is constant. First, let us fix an phase  $e$  with a fixed value of  $\gamma$  and bound the expected regret incurred in this phase. Let  $N$  denote the number of sub-phases in this phase. Just as in the proof of Theorem 10, we can show that the total regret incurred in this phase is at most  $N(\gamma + 1)$ . However, while there are exactly  $K$  sub-phases in any phase of Algorithm 2

(except perhaps the last one), the number of sub-phases in any phase of Algorithm 4 is a random variable.

We now bound  $\mathbb{E}[N]$ , the expected number of sub-phases in any phase. For the fixed phase  $e$ , for any time index  $t$ , let  $F(i, t)$  be the smallest index  $\tau \geq t$  such that  $\sup_{u \in X} \sum_{\tau'=t}^{\tau} \langle c_{\tau'}, w^i(t, \tau') - u \rangle > \gamma$ , where we define  $w^i(t, \tau')$  to be the output of  $A_i$  after seeing input  $c_t, \dots, c_{\tau'-1}$  and  $w^i(t, t)$  to be the initial output of  $A_i$ . We set  $F(i, t) = T$  if no such index  $\tau \leq T$  exists. Intuitively,  $F(i, t)$  denotes the index  $\tau \geq t$  when the regret experienced by algorithm  $A_i$  that is initialized at time  $t$  first exceeds  $\gamma$ .

Let  $C(S, t)$  be the expected number of sub-phases (counting the current one) left in the phase if a sub-phase starts at time  $t$  with the specified set of active indices  $S$ . We define  $C(S, T+1) = C(\emptyset, t) = 0$  for all  $S$  and  $t$  for notational convenience. Note that  $C(S, T) = 1$  for all  $S$ . Further, by definition, we have  $\mathbb{E}[N] = C(\{1, 2, \dots, K\}, t)$  for some  $t$  (corresponding to the start of the phase). We claim that  $C$  satisfies:

$$C(S, t) = 1 + \frac{1}{|S|} \sum_{i \in S} C(S \setminus \{j \in S \mid F(j, t) \leq F(i, t)\}, F(i, t) + 1).$$

To see this, observe that each index  $i \in S$  is equally likely to be selected for the fixed  $i$  throughout the sub-phase starting at time  $t$ . By definition of  $F$ , the sub-phase will end at time  $F(i, t)$  if the selected index is  $i$ . Further, at the end of the sub-phase,  $S$  will be  $S \setminus \{j \in S \mid F(j, t) \leq F(i, t)\}$ . Therefore, conditioned on selecting index  $i$  for this sub-phase, the expected number of sub-phases is  $1 + C(S \setminus \{j \in S \mid F(j, t) \leq F(i, t)\}, F(i, t) + 1)$ . Since each index is selected with probability  $1/|S|$ , the stated identity follows. Now we apply Lemma 15 to conclude that  $C(\{1, \dots, K\}, t) \leq \log_2(K+1)$  for all  $t$ , which implies  $\mathbb{E}[N] \leq \log_2(K+1)$ .

Finally, let  $P$  denote the total number of phases. We can show that  $P \leq 2 + \max(-1, \log_2(\min_i \mathcal{S}_i([1, T], \vec{c})))$ . The proof of this claim is identical to that in Theorem 10 and is omitted for brevity. Let  $N_p$  and  $\gamma_p = 2^{p-1}$  denote the number of sub-phases in phase  $p$  and the corresponding value for  $\gamma$  respectively. We can then conclude the total expected regret experienced by Algorithm 4 is

$$\begin{aligned} \mathbb{E} \left[ \sup_{u \in X} \sum_{t=1}^T \langle c_t, x_t - u \rangle \right] &\leq \sum_{p=1}^P \mathbb{E}[N_p] (\gamma_p + 1) \leq (2^P + P) \cdot \log_2(K+1) \\ &\leq \log_2(K+1) \left( 4 + 4 \min_i \mathcal{S}_i([1, T], \vec{c}) \right). \end{aligned}$$

To prove the second bound for an adaptive adversary, we simply observe that in the worst-case, we cannot have more than  $K$  sub-phases in any phase. The rest of the argument is identical.  $\square$

In order to prove Theorem 11, we need the following technical Lemma:

**Lemma 15.** *Let  $F : [K] \times [T] \rightarrow [T]$  be such that  $F(i, t) \geq t$  for all  $i \in [K], t \in [T]$  and  $C : 2^{[K]} \times [T] \rightarrow \mathbb{R}$  be a function that satisfies  $C(\emptyset, t) = 0$  for all  $t$ ,  $C(S, T) = 1$  for all  $S$ ,  $C(S, T+1) = 0$  for all  $S$ , and  $C$  satisfies the recursion:*

$$C(S, t) = 1 + \frac{1}{|S|} \sum_{i \in S} C(S \setminus \{j \in S \mid F(j, t) \leq F(i, t)\}, F(i, t) + 1).$$

*Then  $C(\{1, \dots, K\}, t) \leq \log_2(K+1)$  for all  $t$ .*

*Proof.* We define the auxiliary function  $Z(N) = \sup_{t, |S| \leq N} C(S, t)$ . Observe  $Z(0) = 0, Z(1) = 1$ , and  $Z(N)$  is non-decreasing with  $N$ . Now suppose for purposes of induction that  $Z(n) \leq \log_2(n+1)$  for  $n < N$ . Then we have

$$\begin{aligned} Z(N) &\leq 1 + \sup_{N' \leq N} \frac{1}{N'} \sup_{t, |S|=N'} \sum_{i \in S} C(S \setminus \{j \in S \mid F(j, t) \leq F(i, t)\}, F(i, t) + 1) \\ &\leq 1 + \sup_{N' \leq N} \frac{1}{N'} \sup_{t, |S|=N'} \sum_{i \in S} Z(N' - |\{j \in S \mid F(j, t) \leq F(i, t)\}|). \end{aligned}$$

Now since  $Z(n)$  is non-decreasing in  $n$ , this is bounded by:

$$\begin{aligned} &\leq 1 + \sup_{N' \leq N} \frac{1}{N'} \sum_{i=1}^{N'} Z(N' - i) \\ &\leq 1 + \sup_{N' \leq N} \frac{1}{N'} \sum_{i=1}^{N'} \log_2(N' - i + 1). \end{aligned}$$

Now we apply Jensen inequality to the concave function  $\log_2(n)$ :

$$\begin{aligned} &\leq 1 + \sup_{N' \leq N} \log_2 \left( \frac{1}{N'} \sum_{i=1}^{N'} N' - i + 1 \right) \\ &\leq 1 + \sup_{N' \leq N} \log_2((N' + 1)/2) \\ &= \log_2(N + 1). \end{aligned}$$

To conclude, note that clearly  $C(\{1, \dots, K\}, t) \leq Z(K)$  for all  $t$ .  $\square$

## E Other applications of the combiner

In this section we discuss a couple of direct applications of our combiner algorithms to other settings.

### E.1 Adapting to different norms

For any  $\ell_p$ -norm,  $p \in (1, 2]$ , there is an algorithm that guarantees regret  $\sup_{u \in \mathcal{B}} \frac{\|u\|_p}{\sqrt{p-1}} \sqrt{\sum_{t=1}^T \|c_t\|_q^2}$  where  $q$  is such that  $\frac{1}{p} + \frac{1}{q} = 1$  (such bounds can be obtained by e.g., the adaptive FTRL analysis described in [19], or see [24] for a non-adaptive version). However, it is not clear which  $p$ -norm yields the best regret guarantee until we have seen all the costs. Fortunately, these are monotone regret bounds, so by making a discrete grid of  $O(\log d)$   $p$ -norms in a  $d$ -dimensional space we can obtain the best of all these bounds in hindsight up to an additional factor of  $\log d$  in the regret. Specifically:

**Theorem 16.** *Let  $K = \lfloor (\log d)/2 \rfloor$ , let  $q_0 = 2$  and  $\frac{1}{q_i} = \frac{1}{q_{i-1}} - \frac{1}{\log d}$  for  $i \leq K$ . Define  $p_i$  by  $\frac{1}{q_i} + \frac{1}{p_i} = 1$ . For each  $i \in [K]$ , let  $\mathcal{A}_i$  be an online learning algorithm that guarantees regret  $\sup_{u \in \mathcal{B}} \frac{\|u\|_{p_i}}{\sqrt{p_i-1}} \sqrt{\sum_{t=1}^T \|c_t\|_{q_i}^2}$ . Then combining these algorithms using Algorithm 2 yields a worst-case regret bound of:*

$$\mathbb{E}[\mathcal{R}_{\mathcal{A}}(\mathcal{B}, \vec{c})] \leq O \left( (\log \log d) \cdot \inf_p \sup_{u \in \mathcal{B}} \frac{\|u\|_p}{\sqrt{p-1}} \sqrt{\sum_{t=1}^T \|c_t\|_q^2} \right).$$

### E.2 Simultaneous Adagrad and dimension-free bounds

The adaptive online gradient descent algorithm of [15] obtains the regret bound  $D_2 \sqrt{\sum_{t=1}^T \|c_t\|_2^2}$ , where  $D_2$  is the  $\ell_2$ -diameter of  $\mathcal{B}$ . In contrast, the Adagrad algorithm obtains the bound  $D_\infty \sum_{i=1}^d \sqrt{\sum_{t=1}^T c_{t,i}^2}$  where  $D_\infty$  is the  $\ell_\infty$ -diameter of  $\mathcal{B}$  and  $c_{t,i}$  is the  $i$ th component of  $c_t$  [10]. Adagrad's bound can be extremely good when the  $c_t$  are sparse, but might be much worse than the adaptive online gradient descent bound otherwise. However, both bounds are clearly monotone, so by applying our combiner construction, we have:

**Theorem 17.** *There is an algorithm  $\mathcal{A}$  such that for any sequence of vectors  $\vec{c}$ , the regret is at most:*

$$\mathbb{E}[\mathcal{R}_{\mathcal{A}}(\mathcal{B}, \vec{c})] \leq O \left( \min \left\{ D_2 \sqrt{\sum_{t=1}^T \|c_t\|_2^2}, D_\infty \sum_{i=1}^d \sqrt{\sum_{t=1}^T c_{t,i}^2} \right\} \right).$$



## F Proof of Theorem 13

**Theorem 13.** *There is an algorithm  $\mathcal{A}$  for the unconstrained setting such that for any  $u \in \mathbb{R}^d$  and any  $\alpha \in (0, 1)$ , we have*

$$\mathcal{R}_{\mathcal{A}}(u, \bar{c} \mid H) = O \left( \inf_{w \in \Delta_K} \left\{ \|u\| (\log T) \left( \frac{\sqrt{\log K}}{\alpha} + \sqrt{\frac{B_{\alpha}^{H(w)}}{\alpha}} \right) \right\} \right).$$

*Proof.* Algorithm  $\mathcal{A}$  instantiates one  $d$ -dimensional parameter-free OLO algorithm  $\mathcal{A}'$  that outputs  $x_t$ , gets costs  $c_t$ , and guarantees regret for some user specified  $\epsilon$ :

$$\sum_{t=1}^T \langle c_t, x_t - u \rangle \leq \epsilon + O \left( \|u\| \log(T) + \|u\| \sqrt{\sum_{t=1}^T \|c_t\|^2 \log \frac{T}{\epsilon}} \right).$$

Where the  $O$  hides absolute constants. Such algorithms are described in several recent works [7, 8, 27, 17, 20]. Also, algorithm  $\mathcal{A}$  instantiates  $K$  one-dimensional learning algorithms,  $\mathcal{A}_i$  for the hint sequence  $h^{(i)}$ . At time  $t$ , the  $i$ th such learner outputs  $y_t^{(i)}$ , gets cost  $\langle c_t, h_t^{(i)} \rangle$  and guarantees regret:

$$\begin{aligned} \sum_{t=1}^T \langle c_t, h_t^{(i)} \rangle (y^{(i)} - y_t^{(i)}) &\leq \frac{\epsilon}{K} + O \left( |y^{(i)}| \log(T) + |y^{(i)}| \sqrt{\sum_{t=1}^T \langle c_t, h_t^{(i)} \rangle^2 \log \frac{KT}{\epsilon}} \right) \\ &\leq \frac{\epsilon}{K} + O \left( |y^{(i)}| \log(T) + |y^{(i)}| \sqrt{\sum_{t=1}^T \|c_t\|^2 \log \frac{KT}{\epsilon}} \right). \end{aligned}$$

These one-dimensional learners may simply be instances of the  $d$ -dimensional learner restricted to one dimension. The algorithm  $\mathcal{A}$  responds with the predictions  $\hat{x}_t = x_t - \sum_{i=1}^K y_t^{(i)} h_t^{(i)}$  and set  $\epsilon = 1$ . The regret is:

$$\begin{aligned} \sum_{t=1}^T \langle c_t, \hat{x}_t - u \rangle &= \sum_{t=1}^T \langle c_t, x_t - u \rangle - \sum_{i=1}^K \sum_{t=1}^T \langle c_t, h_t^{(i)} \rangle y_t^{(i)} \\ &= \inf_{y^{(1)}, \dots, y^{(K)} \in \mathbb{R}} \left\{ \sum_{t=1}^T \langle c_t, x_t - u \rangle + \sum_{i=1}^K \sum_{t=1}^T \langle c_t, h_t^{(i)} \rangle (y^{(i)} - y_t^{(i)}) - \sum_{t=1}^T \left\langle c_t, \sum_{i=1}^K y^{(i)} h_t^{(i)} \right\rangle \right\} \\ &\leq O \left( \inf_{y^{(1)}, \dots, y^{(K)} \in \mathbb{R}} \left\{ 1 + \|u\| \sqrt{\sum_{t=1}^T \|c_t\|^2 \log T} + \sum_{i=1}^K \left( \frac{1}{K} + |y^{(i)}| \sqrt{\sum_{t=1}^T \|c_t\|^2 \log(KT)} \right) \right. \right. \\ &\quad \left. \left. + \|u\| \log(T) + \sum_{i=1}^K |y^{(i)}| \log(T) - \sum_{t=1}^T \left\langle c_t, \sum_{i=1}^K y^{(i)} h_t^{(i)} \right\rangle \right\} \right) \\ &\leq O \left( 2 + \inf_{\sum_i |y^{(i)}| \leq \|u\| \sqrt{\frac{\log T}{\log(KT)}}} \left\{ 2\|u\| \log(T) + 2\|u\| \sqrt{\sum_{t=1}^T \|c_t\|^2 \log T} - \sum_{t=1}^T \left\langle c_t, \sum_{i=1}^K y^{(i)} h_t^{(i)} \right\rangle \right\} \right). \end{aligned}$$

Let  $w$  be an arbitrary element of  $\Delta_K$ . We set  $y^{(i)} = \|u\| \frac{w^{(i)}}{\sqrt{\alpha |B_{\alpha}^{H(w)}| + \frac{\log(KT)}{\log T}}}$ . Notice that this implies

$\sum |y^{(i)}| \leq \|u\| \sqrt{\frac{\log T}{\log(KT)}}$ . Also, we have

$$\begin{aligned} - \sum_{t=1}^T \langle c_t, H(w)_t \rangle &\leq - \sum_{t=1}^T \alpha \|c_t\|^2 + 2|B_{\alpha}^{H(w)}|, \quad \text{and} \\ - \sum_{t=1}^T \left\langle c_t, \sum_{i=1}^K y^{(i)} h_t^{(i)} \right\rangle &\leq - \frac{\|u\|}{\sqrt{\alpha |B_{\alpha}^{H(w)}| + \frac{\log(KT)}{\log T}}} \sum_{t=1}^T \alpha \|c_t\|^2 + 2\|u\| \sqrt{\frac{|B_{\alpha}^{H(w)}|}{\alpha}}. \end{aligned}$$

Thus the regret bound for  $\mathcal{A}$  becomes

$$\begin{aligned}
\mathcal{R}_{\mathcal{A}}(u, \vec{c} \mid H) &\leq O \left( 2 + w\|u\| \log(T) + 2\|u\| \sqrt{\frac{|B_{\alpha}^{H(w)}|}{\alpha}} \right. \\
&\quad \left. + 2\|u\| \sqrt{\sum_{t=1}^T \|c_t\|^2 \log T} - \frac{\|u\|}{\sqrt{\alpha |B_{\alpha}^{H(w)}| + \frac{\log(KT)}{\log T}}} \sum_{t=1}^T \alpha \|c_t\|^2 \right) \\
&\leq O \left( 2 + \frac{\|u\|(\log T) \sqrt{\alpha |B_{\alpha}^{H(w)}| + \frac{\log(KT)}{\log T}}}{\alpha} + 2\|u\| \sqrt{\frac{|B_{\alpha}^{H(w)}|}{\alpha}} \right) \\
&= O \left( \frac{\|u\| \sqrt{(\log T) \log(KT)}}{\alpha} + \|u\|(\log T) \sqrt{\frac{|B_{\alpha}^{H(w)}|}{\alpha}} \right).
\end{aligned}$$

Since  $w$  was chosen arbitrarily in  $\Delta_K$ , the bound holds for all  $w \in \Delta_K$  and so we are done.  $\square$
